# Supplementary material for: Solvent induced mononuclear and dinuclear mixed ligand Cu(ii) complex: structural diversity, supramolecular packing polymorphism and molecular docking studies
Source: Royal Society of Chemistry journal article supplement (doi:10.1039/d0nj03567j), 2020-01-01
Supplement: d0nj03567j1.pdf [file d0nj03567j1.pdf]

**Solvent induced mononuclear and dinuclear mixed ligand Cu(II) complex:  
Structural diversity, supramolecular packing polymorphism and molecular  
docking studies**

Mahesha<sup>a</sup>, M. K. Hema<sup>a</sup>, C. S. Karthik<sup>b</sup>, K. J. Pampa<sup>c</sup>, P. Mallu<sup>b</sup> and N. K. Lokanath<sup>a\*</sup>

*<sup>a</sup>Department of Studies in Physics, University of Mysore, Manasagangotri, Mysuru-570 006,  
Karnataka, India.*

*<sup>b</sup>Department of Chemistry, SJCE, JSS Science and Technology University, Mysuru-570 006,  
Karnataka, India.*

*<sup>c</sup>Department of Biotechnology, University of Mysore, Manasagangotri, Mysuru-570006,  
Karnataka, India.*

\*Corresponding author: E-mail : [lokanath@physics.uni-mysore.ac.in](mailto:lokanath@physics.uni-mysore.ac.in)

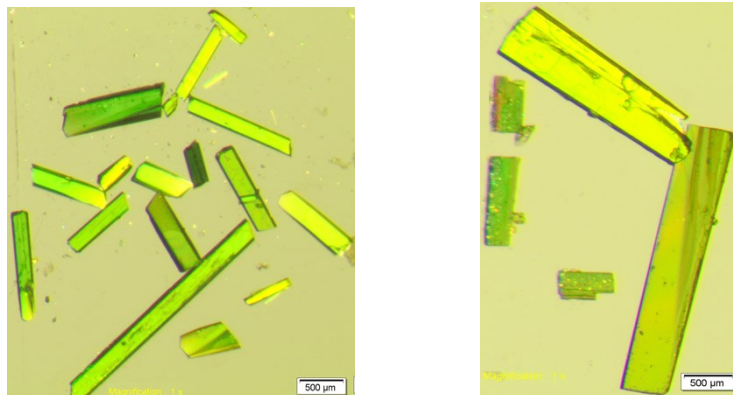

Figure S1: (a) Single crystals of the polymorph **1** and **2**.

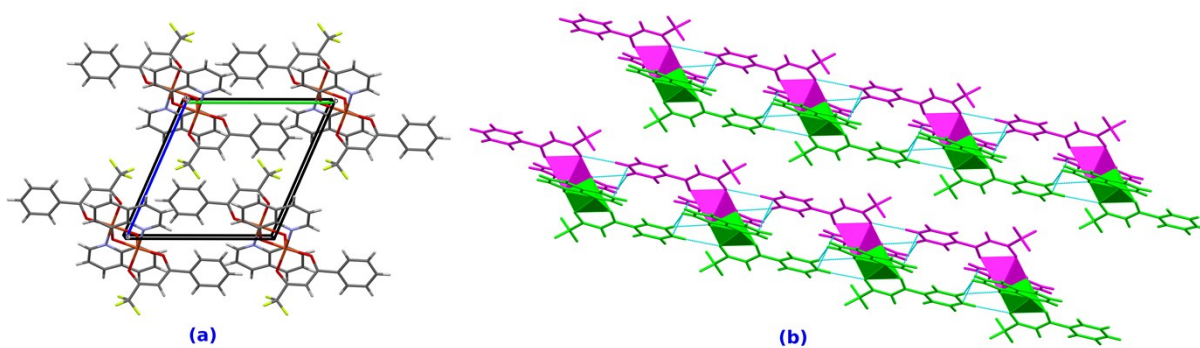

Figure S2: (a) The projection of crystal packing of along *b*-axis (b) an infinite 1-D chain packing of polymorph **1**.

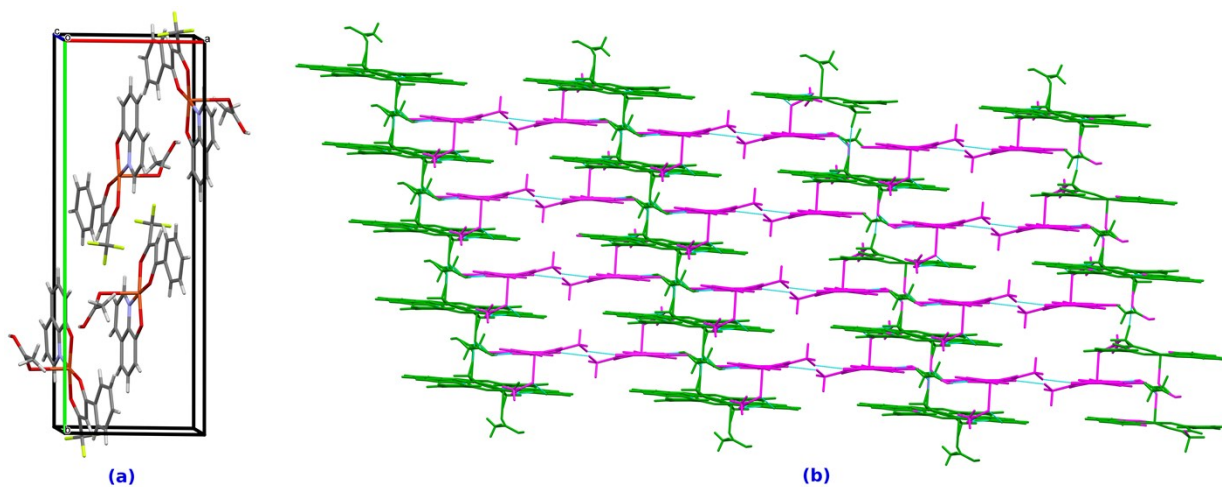

Figure S3: (a) The projection of crystal packing along *c*-axis (b) 2-D ladder like architecture of polymorph **2**.

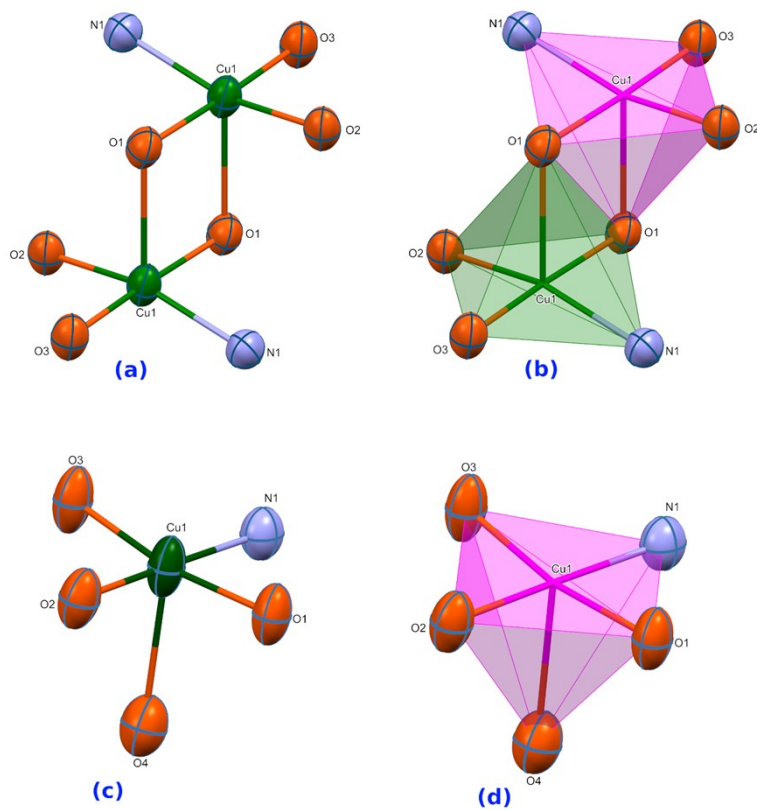

Figure S4: Square pyramidal geometry by (a) doubly phenoxide oxygen bridged dimer in polymorph 1 and (b) apically coordinated acetic acid molecule in polymorph 2.

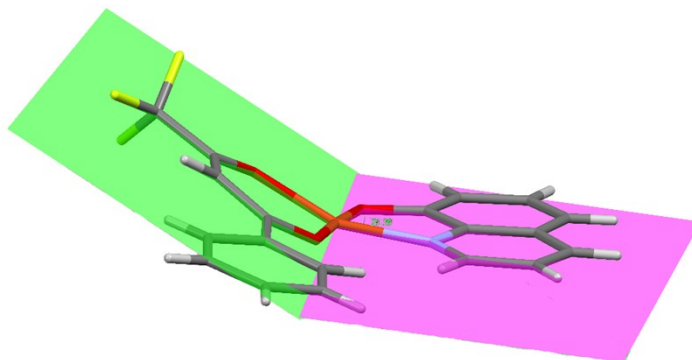

Figure S5: Envelope conformation of Cu(II) complex in polymorph 1.

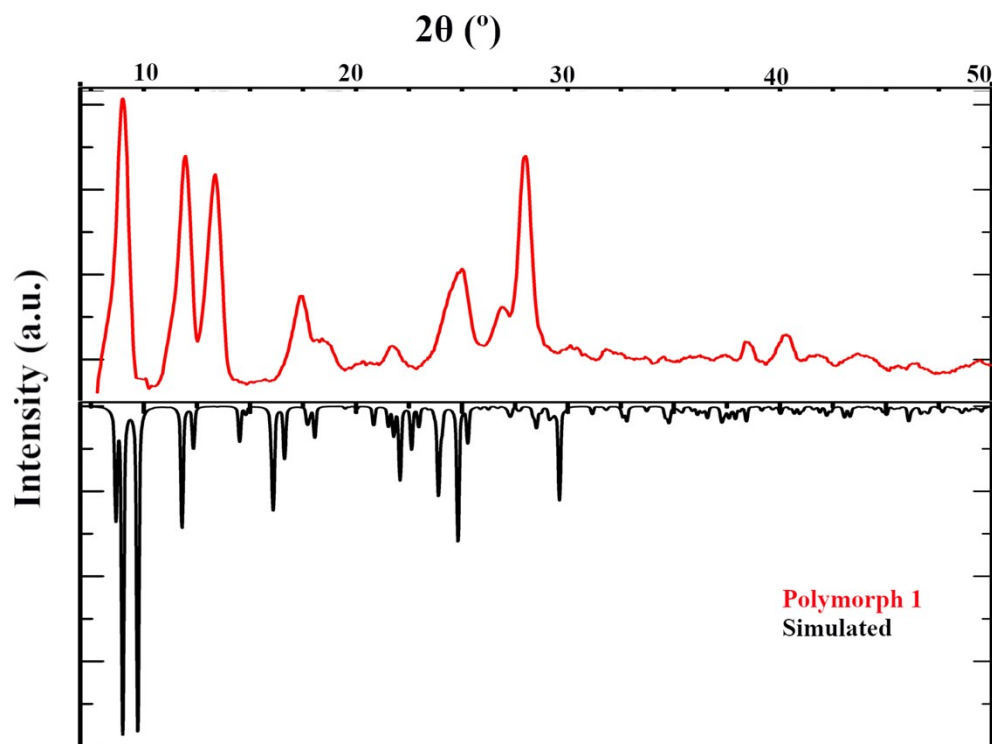

Figure S6a: PXRD pattern of polymorph 1.

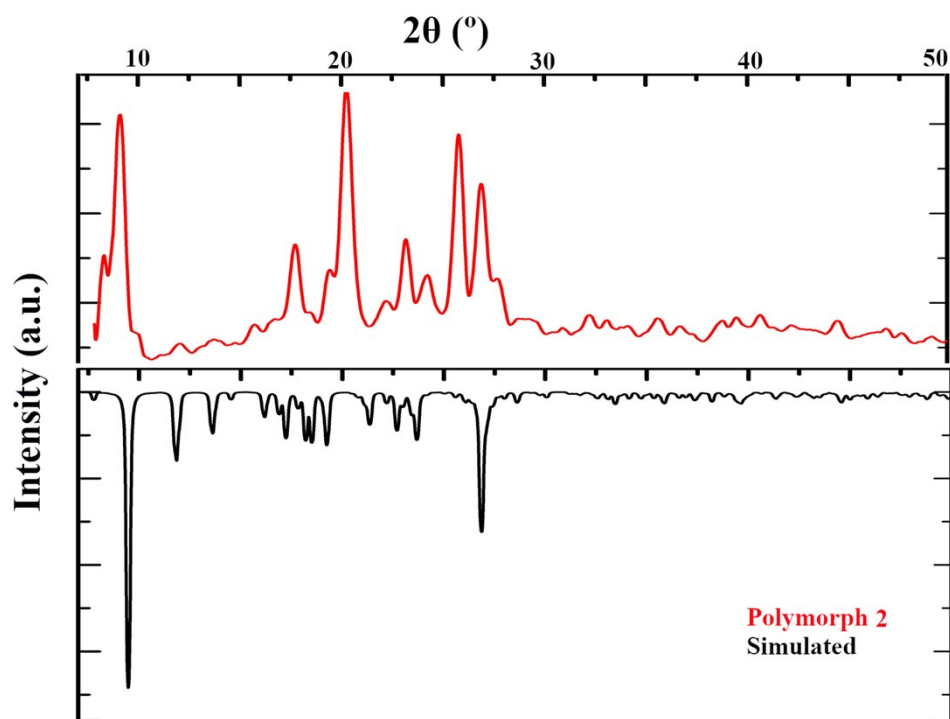

Figure S6b: PXRD pattern of polymorph 2.

Table S1: Bond lengths comparison of polymorph 1 and 2 (XRD and DFT).

| No.                            | Polymorph 1 |      | XRD      | DFT    | Polymorph 2                    |     | XRD      | DFT    |
|--------------------------------|-------------|------|----------|--------|--------------------------------|-----|----------|--------|
|                                |             |      |          |        |                                |     |          |        |
| 1                              | Cu1         | O1   | 1.944(3) | 2.1569 | Cu1                            | O3  | 1.924(4) | 1.9801 |
| 2                              | Cu1         | O3   | 1.930(3) | 2.1237 | Cu1                            | O1  | 1.945(4) | 1.9675 |
| 3                              | Cu1         | O2   | 1.955(3) | 1.9783 | Cu1                            | O2  | 1.928(5) | 1.9848 |
| 4                              | Cu1         | N1   | 1.978(3) | 2.03   | Cu1                            | O4  | 2.479(4) | 2.4366 |
| 5                              | Cu1         | O1i  | 2.387(4) | 2.308  | Cu1                            | N1  | 1.977(5) | 2.0215 |
| 6                              | O1          | C18  | 1.328(4) | 1.301  | O3                             | C2  | 1.268(7) | 1.2662 |
| 7                              | O1          | Cu1i | 2.387(4) | 2.308  | O1                             | C18 | 1.332(8) | 1.3097 |
| 8                              | O3          | C4   | 1.270(4) | 1.258  | O2                             | C4  | 1.266(8) | 1.2639 |
| 9                              | O2          | C2   | 1.272(4) | 1.269  | C8                             | C7  | 1.36(1)  | 1.3941 |
| 10                             | N1          | C19  | 1.368(5) | 1.358  | C8                             | C9  | 1.38(1)  | 1.3951 |
| 11                             | N1          | C11  | 1.329(7) | 1.326  | O4                             | C21 | 1.210(9) | 1.2141 |
| 12                             | C2          | C3   | 1.374(6) | 1.382  | N1                             | C11 | 1.315(9) | 1.3214 |
| 13                             | C2          | C1   | 1.525(7) | 1.544  | N1                             | C19 | 1.367(6) | 1.3627 |
| 14                             | C18         | C19  | 1.425(7) | 1.445  | C11                            | C12 | 1.41(1)  | 1.4092 |
| 15                             | C18         | C17  | 1.391(6) | 1.404  | O5                             | C21 | 1.311(9) | 1.3503 |
| 16                             | C19         | C14  | 1.419(5) | 1.419  | C3                             | C4  | 1.428(9) | 1.422  |
| 17                             | C4          | C5   | 1.481(6) | 1.498  | C3                             | C2  | 1.37(1)  | 1.3848 |
| 18                             | C4          | C3   | 1.416(7) | 1.429  | C4                             | C5  | 1.492(9) | 1.4949 |
| 19                             | C5          | C6   | 1.395(5) | 1.403  | C19                            | C14 | 1.44(1)  | 1.4218 |
| 20                             | C5          | C10  | 1.390(8) | 1.403  | C19                            | C18 | 1.391(9) | 1.4365 |
| 23                             | C11         | C12  | 1.397(6) | 1.406  | C14                            | C15 | 1.418(8) | 1.4156 |
| 24                             | C14         | C15  | 1.409(7) | 1.420  | C14                            | C13 | 1.41(1)  | 1.4167 |
| 25                             | C14         | C13  | 1.41(1)  | 1.415  | C15                            | C16 | 1.34(1)  | 1.3817 |
| 27                             | C6          | C7   | 1.383(8) | 1.393  | F1                             | C1  | 1.235(9) | 1.3497 |
| 29                             | C8          | C9   | 1.364(6) | 1.396  | C5                             | C10 | 1.38(1)  | 1.4029 |
| 30                             | C8          | C7   | 1.382(8) | 1.395  | C5                             | C6  | 1.38(1)  | 1.4021 |
| 31                             | C17         | C16  | 1.412(6) | 1.404  | C16                            | C17 | 1.40(1)  | 1.4089 |
| 32                             | C10         | C9   | 1.373(8) | 1.391  | C17                            | C18 | 1.404(6) | 1.3955 |
| 33                             | C15         | C16  | 1.362(9) | 1.384  | F3                             | C1  | 1.29(1)  | 1.3489 |
| 34                             | C12         | C13  | 1.367(8) | 1.378  | C2                             | C1  | 1.504(9) | 1.5428 |
| 35                             | F1          | C1   | 1.321(7) | 1.352  | C10                            | C9  | 1.41(1)  | 1.3901 |
| 36                             | F2          | C1   | 1.325(8) | 1.354  | C6                             | C7  | 1.37(1)  | 1.3918 |
| 37                             | F3          | C1   | 1.309(5) | 1.349  | C1                             | F2  | 1.294(9) | 1.348  |
| <b>Correlation coefficient</b> |             |      | 0.9841   |        | <b>Correlation coefficient</b> |     |          | 0.9935 |

Table S2: Comparison bond angles of polymorph 1 and 2 (XRD and DFT).

| No. | Polymorph 1 |     |    | XRD      | DFT    | Polymorph 2 |     |    | XRD      | DFT    |
|-----|-------------|-----|----|----------|--------|-------------|-----|----|----------|--------|
|     |             |     |    |          |        |             |     |    |          |        |
| 1   | O1          | Cu1 | O3 | 176.5(1) | 171.94 | O3          | Cu1 | O1 | 170.4(2) | 172.49 |
| 2   | O1          | Cu1 | O2 | 91.6(1)  | 97.36  | O3          | Cu1 | O2 | 92.4(2)  | 90.73  |
| 3   | O1          | Cu1 | N1 | 84.3(1)  | 79.46  | O3          | Cu1 | O4 | 100.3(2) | 91.76  |
| 4   | O1          | Cu1 | O1 | 85.4(1)  | 86.99  | O3          | Cu1 | N1 | 90.8(2)  | 92.86  |
| 5   | O3          | Cu1 | O2 | 91.8(1)  | 89.31  | O1          | Cu1 | O2 | 92.5(2)  | 92.25  |
| 6   | O3          | Cu1 | N1 | 92.5(2)  | 94.20  | O1          | Cu1 | O4 | 88.1(2)  | 95.08  |
| 7   | O3          | Cu1 | O1 | 94.3(1)  | 99.40  | O1          | Cu1 | N1 | 84.0(2)  | 83.22  |
| 8   | O2          | Cu1 | N1 | 159.7(2) | 157.56 | O2          | Cu1 | O4 | 87.8(2)  | 90.83  |

|                                |     |     |     |               |        |                                |     |     |          |               |
|--------------------------------|-----|-----|-----|---------------|--------|--------------------------------|-----|-----|----------|---------------|
| 9                              | O2  | Cu1 | O1  | 91.4(1)       | 94.72  | O2                             | Cu1 | N1  | 176.2(2) | 170.99        |
| 10                             | N1  | Cu1 | O1  | 108.0(1)      | 103.90 | O4                             | Cu1 | N1  | 93.5(2)  | 97.31         |
| 11                             | Cu1 | O1  | C18 | 111.3(3)      | 109.44 | Cu1                            | O3  | C2  | 124.1(4) | 124.59        |
| 12                             | Cu1 | O1  | Cu1 | 94.6(1)       | 93.01  | Cu1                            | O1  | C18 | 111.5(4) | 112.46        |
| 13                             | C18 | O1  | Cu1 | 112.6(3)      | 116.90 | Cu1                            | O2  | C4  | 128.4(4) | 128.44        |
| 14                             | Cu1 | O3  | C4  | 129.1(3)      | 126.73 | C7                             | C8  | C9  | 119.7(8) | 119.82        |
| 15                             | Cu1 | O2  | C2  | 123.6(3)      | 125.37 | Cu1                            | O4  | C21 | 118.0(5) | 130.13        |
| 16                             | Cu1 | N1  | C19 | 110.4(3)      | 113.21 | Cu1                            | N1  | C11 | 129.1(4) | 129.28        |
| 17                             | Cu1 | N1  | C11 | 130.7(3)      | 126.91 | Cu1                            | N1  | C19 | 110.0(4) | 110.31        |
| 18                             | C19 | N1  | C11 | 118.6(4)      | 119.67 | C11                            | N1  | C19 | 120.9(5) | 120.41        |
| 19                             | O2  | C2  | C3  | 129.1(4)      | 130.68 | N1                             | C11 | C12 | 121.1(6) | 121.34        |
| 20                             | O2  | C2  | C1  | 112.3(4)      | 111.49 | C4                             | C3  | C2  | 122.8(6) | 122.87        |
| 21                             | C3  | C2  | C1  | 118.6(4)      | 117.8  | O2                             | C4  | C3  | 122.9(6) | 124.02        |
| 22                             | O1  | C18 | C19 | 118.2(4)      | 118.5  | O2                             | C4  | C5  | 117.3(5) | 116.02        |
| 23                             | O1  | C18 | C17 | 124.7(4)      | 124.1  | C3                             | C4  | C5  | 119.5(5) | 119.95        |
| 24                             | C19 | C18 | C17 | 117.1(4)      | 117.4  | N1                             | C19 | C14 | 120.6(5) | 122.08        |
| 25                             | N1  | C19 | C18 | 115.0(4)      | 116.5  | N1                             | C19 | C18 | 116.3(5) | 115.48        |
| 26                             | N1  | C19 | C14 | 122.5(4)      | 122.1  | C14                            | C19 | C18 | 123.1(5) | 122.44        |
| 27                             | C18 | C19 | C14 | 122.4(4)      | 121.4  | C19                            | C14 | C15 | 116.2(6) | 118.49        |
| 28                             | O3  | C4  | C5  | 116.6(4)      | 117.3  | C19                            | C14 | C13 | 117.1(6) | 116.3         |
| 29                             | O3  | C4  | C3  | 122.9(4)      | 123.9  | C15                            | C14 | C13 | 126.7(6) | 125.2         |
| 30                             | C5  | C4  | C3  | 120.5(4)      | 118.8  | C14                            | C15 | C16 | 120.1(6) | 118.94        |
| 31                             | C4  | C5  | C6  | 122.7(4)      | 122.3  | C4                             | C5  | C10 | 117.6(6) | 118.22        |
| 32                             | C4  | C5  | C10 | 119.8(4)      | 118.7  | C4                             | C5  | C6  | 122.8(6) | 122.83        |
| 33                             | C6  | C5  | C10 | 117.4(5)      | 119.0  | C10                            | C5  | C6  | 119.5(6) | 118.94        |
| 34                             | C2  | C3  | C4  | 123.2(4)      | 123.8  | C15                            | C16 | C17 | 124.0(6) | 122.66        |
| 35                             | N1  | C11 | C12 | 122.4(5)      | 122.1  | C16                            | C17 | C18 | 118.6(6) | 120.73        |
| 36                             | C19 | C14 | C15 | 117.6(4)      | 118.7  | O3                             | C2  | C3  | 128.8(6) | 129.31        |
| 37                             | C19 | C14 | C13 | 116.7(5)      | 117.1  | O3                             | C2  | C1  | 112.5(5) | 112.2         |
| 38                             | C15 | C14 | C13 | 125.7(5)      | 124.2  | C3                             | C2  | C1  | 118.7(6) | 118.5         |
| 39                             | C5  | C6  | C7  | 120.9(5)      | 120.4  | C5                             | C10 | C9  | 118.7(6) | 120.5         |
| 40                             | C9  | C8  | C7  | 119.6(5)      | 119.8  | C5                             | C6  | C7  | 121.5(7) | 120.44        |
| 41                             | C18 | C17 | C16 | 120.7(5)      | 120.8  | F1                             | C1  | F3  | 106.6(7) | 107.23        |
| 42                             | C5  | C10 | C9  | 121.5(5)      | 120.6  | F1                             | C1  | C2  | 116.6(7) | 113.45        |
| 43                             | C14 | C15 | C16 | 120.5(5)      | 119.8  | F1                             | C1  | F2  | 105.4(7) | 107.3         |
| 44                             | C11 | C12 | C13 | 119.9(5)      | 119.3  | F3                             | C1  | C2  | 115.7(7) | 110.49        |
| 45                             | C17 | C16 | C15 | 121.7(5)      | 121.9  | F3                             | C1  | F2  | 101.0(7) | 107.43        |
| 46                             | C8  | C9  | C10 | 120.6(5)      | 120.1  | C2                             | C1  | F2  | 110.1(6) | 110.69        |
| 47                             | C14 | C13 | C12 | 119.9(5)      | 119.8  | O4                             | C21 | O5  | 123.6(7) | 120.91        |
| 48                             | C6  | C7  | C8  | 120.1(5)      | 120.2  | O4                             | C21 | C20 | 123.5(7) | 126.22        |
| 49                             | C2  | C1  | F1  | 111.1(4)      | 110.9  | O5                             | C21 | C20 | 112.8(6) | 112.85        |
| 50                             | C2  | C1  | F2  | 111.3(4)      | 110.5  | C14                            | C13 | C12 | 120.0(6) | 120.36        |
| 51                             | C2  | C1  | F3  | 114.8(4)      | 114.2  | O1                             | C18 | C19 | 118.1(5) | 118.52        |
| 52                             | F1  | C1  | F2  | 104.2(4)      | 106.9  | O1                             | C18 | C17 | 123.9(5) | 124.73        |
| 53                             | F1  | C1  | F3  | 107.7(4)      | 107.1  | C19                            | C18 | C17 | 118.0(5) | 116.74        |
| <b>Correlation coefficient</b> |     |     |     | <b>0.9911</b> |        | <b>Correlation coefficient</b> |     |     |          | <b>0.9830</b> |

Table S3: Comparison of torsion angles of polymorph 1 and 2 (XRD and DFT).

| No. | Polymorph 1 |     |     |     | XRD       | DFT     | Polymorph 2 |     |     |     | XRD       | DFT     |
|-----|-------------|-----|-----|-----|-----------|---------|-------------|-----|-----|-----|-----------|---------|
|     |             |     |     |     |           |         |             |     |     |     |           |         |
| 1   | O3          | Cu1 | O1  | C18 | -32(2)    | 23.13   | O1          | Cu1 | O3  | C2  | -113(1)   | -115.59 |
| 2   | O3          | Cu1 | O1  | Cu1 | 84(2)     | 143.07  | O2          | Cu1 | O3  | C2  | 7.4(5)    | -2.2    |
| 3   | O2          | Cu1 | O1  | C18 | 152.2(3)  | 142.92  | O4          | Cu1 | O3  | C2  | 95.6(5)   | 88.65   |
| 4   | O2          | Cu1 | O1  | Cu1 | -91.3(1)  | 94.37   | N1          | Cu1 | O3  | C2  | -170.7(5) | -173.94 |
| 5   | N1          | Cu1 | O1  | C18 | -7.8(3)   | -15.2   | O3          | Cu1 | O1  | C18 | -59(1)    | -59.48  |
| 6   | N1          | Cu1 | O1  | Cu1 | 108.7(1)  | 104.73  | O2          | Cu1 | O1  | C18 | -179.7(4) | -172.77 |
| 7   | O1i         | Cu1 | O1  | C18 | -116.5(3) | -119.93 | O4          | Cu1 | O1  | C18 | 92.6(4)   | 96.19   |
| 8   | O1          | Cu1 | O1  | Cu1 | -0.0(1)   | 0       | N1          | Cu1 | O1  | C18 | -1.1(4)   | -0.59   |
| 9   | O1          | Cu1 | O3  | C4  | -179(2)   | 119.24  | O3          | Cu1 | O2  | C4  | -2.7(5)   | 2.5     |
| 10  | O2          | Cu1 | O3  | C4  | -3.6(4)   | -0.87   | O1          | Cu1 | O2  | C4  | 169.1(5)  | 175.61  |
| 11  | N1          | Cu1 | O3  | C4  | 156.5(4)  | 156.93  | O4          | Cu1 | O2  | C4  | -102.9(5) | -89.27  |
| 12  | O1          | Cu1 | O3  | C4  | -95.2(4)  | -98.22  | N1          | Cu1 | O2  | C4  | 146(3)    | 116.02  |
| 13  | O1          | Cu1 | O2  | C2  | -174.2(3) | -168.81 | O3          | Cu1 | O4  | C21 | -159.0(5) | -149.67 |
| 14  | O3          | Cu1 | O2  | C2  | 6.0(4)    | 4.19    | O1          | Cu1 | O4  | C21 | 25.6(5)   | 33.42   |
| 15  | N1          | Cu1 | O2  | C2  | -96.3(5)  | -95.12  | O2          | Cu1 | O4  | C21 | -67.0(5)  | -58.92  |
| 16  | O1          | Cu1 | O2  | C2  | 100.4(3)  | 103.62  | N1          | Cu1 | O4  | C21 | 109.5(5)  | 117.22  |
| 17  | O1          | Cu1 | N1  | C19 | 7.5(3)    | 11.18   | O3          | Cu1 | N1  | C11 | -7.0(5)   | -6.28   |
| 18  | O1          | Cu1 | N1  | C11 | -179.0(4) | -174.26 | O3          | Cu1 | N1  | C19 | 173.3(4)  | 174.25  |
| 19  | O3          | Cu1 | N1  | C19 | -173.9(3) | -163.82 | O1          | Cu1 | N1  | C11 | -178.9(5) | -179.85 |
| 20  | O3          | Cu1 | N1  | C11 | -0.5(4)   | 10.75   | O1          | Cu1 | N1  | C19 | 1.4(4)    | 0.68    |
| 21  | O2          | Cu1 | N1  | C19 | -71.7(5)  | -65.46  | O2          | Cu1 | N1  | C11 | -156(3)   | -119.64 |
| 22  | O2          | Cu1 | N1  | C11 | 101.8(6)  | 109.11  | O2          | Cu1 | N1  | C19 | 24(3)     | 60.89   |
| 23  | O1          | Cu1 | N1  | C19 | 90.7(3)   | 95.38   | O4          | Cu1 | N1  | C11 | 93.4(5)   | 85.87   |
| 24  | O1          | Cu1 | N1  | C11 | -95.8(4)  | -90.05  | O4          | Cu1 | N1  | C19 | -86.3(4)  | -93.6   |
| 25  | O1          | Cu1 | O1  | Cu1 | 0.0(1)    | 0       | Cu1         | O3  | C2  | C3  | -8.4(9)   | 1.3     |
| 26  | O1          | Cu1 | O1  | C18 | -115.4(3) | -113.6  | Cu1         | O3  | C2  | C1  | 169.9(4)  | -178.94 |
| 27  | O3          | Cu1 | O1  | Cu1 | -176.5(1) | -175.1  | Cu1         | O1  | C18 | C19 | 0.7(6)    | 0.4     |
| 28  | O3          | Cu1 | O1  | C18 | 68.1(3)   | 71.3    | Cu1         | O1  | C18 | C17 | 179.9(5)  | -179.6  |
| 29  | O2          | Cu1 | O1  | Cu1 | 91.5(1)   | -97.15  | Cu1         | O2  | C4  | C3  | -1.8(9)   | -1.72   |
| 30  | O2          | Cu1 | O1  | C18 | -23.9(3)  | -19.23  | Cu1         | O2  | C4  | C5  | -175.5(4) | 179.3   |
| 31  | N1          | Cu1 | O1  | Cu1 | -82.5(2)  | -78.37  | C9          | C8  | C7  | C6  | -4(1)     | -0.5    |
| 32  | N1          | Cu1 | O1  | C18 | 162.2(3)  | 168.03  | C7          | C8  | C9  | C10 | 3(1)      | -0.1    |
| 33  | Cu1         | O1  | C18 | C19 | 6.8(5)    | 16.89   | Cu1         | O4  | C21 | O5  | -101.7(7) | 179.12  |
| 34  | Cu1         | O1  | C18 | C17 | -174.4(4) | -165.3  | Cu1         | O4  | C21 | C20 | 76.5(8)   | 0.22    |
| 35  | Cu1         | O1  | C18 | C19 | -98.1(4)  | -87.09  | Cu1         | N1  | C11 | C12 | -178.7(5) | -179.27 |
| 36  | Cu1         | O1  | C18 | C17 | 80.8(5)   | 90.73   | C19         | N1  | C11 | C12 | 0.9(9)    | 0.15    |
| 37  | Cu1         | O1  | Cu1 | O1  | 0.0(1)    | 0       | Cu1         | N1  | C19 | C14 | 179.0(4)  | 179.55  |
| 38  | Cu1         | O1  | Cu1 | O3  | 176.5(1)  | 175.1   | Cu1         | N1  | C19 | C18 | -1.5(6)   | -0.66   |
| 39  | Cu1         | O1  | Cu1 | O2  | -91.5(1)  | -94.37  | C11         | N1  | C19 | C14 | -0.6(8)   | 0.03    |
| 40  | Cu1         | O1  | Cu1 | N1  | 82.5(2)   | 78.37   | C11         | N1  | C19 | C18 | 178.8(5)  | 179.82  |
| 41  | C18         | O1  | Cu1 | O1  | 115.4(3)  | 113.6   | N1          | C11 | C12 | C13 | 0(1)      | -0.16   |
| 42  | C18         | O1  | Cu1 | O3  | -68.1(3)  | -71.3   | C2          | C3  | C4  | O2  | 3(1)      | -0.22   |
| 43  | C18         | O1  | Cu1 | O2  | 23.9(3)   | 19.23   | C2          | C3  | C4  | C5  | 176.9(6)  | 178.72  |
| 44  | C18         | O1  | Cu1 | N1  | -162.2(3) | -168.03 | C4          | C3  | C2  | O3  | 2(1)      | 0.42    |
| 45  | Cu1         | O3  | C4  | C5  | 179.8(3)  | 179.1   | C4          | C3  | C2  | C1  | -176.0(6) | -179.33 |
| 46  | Cu1         | O3  | C4  | C3  | -0.8(6)   | -2.12   | O2          | C4  | C5  | C10 | 14.2(9)   | 17      |
| 47  | Cu1         | O2  | C2  | C3  | -4.7(7)   | -5.15   | O2          | C4  | C5  | C6  | -165.4(6) | -162.38 |
| 48  | Cu1         | O2  | C2  | C1  | 175.3(3)  | 174.47  | C3          | C4  | C5  | C10 | -159.8(6) | -162.03 |
| 49  | Cu1         | N1  | C19 | C18 | -5.9(5)   | -6.04   | C3          | C4  | C5  | C6  | 20.6(9)   | 18.6    |
| 50  | Cu1         | N1  | C19 | C14 | 174.4(4)  | 172.22  | N1          | C19 | C14 | C15 | 180.0(5)  | 179.89  |
| 51  | C11         | N1  | C19 | C18 | 179.7(4)  | 178.96  | N1          | C19 | C14 | C13 | -0.9(9)   | -0.18   |
| 52  | C11         | N1  | C19 | C14 | 0.1(7)    | -2.78   | C18         | C19 | C14 | C15 | 0.5(9)    | 0.11    |

|                                |     |     |     |     |               |         |                                |     |     |     |           |               |  |
|--------------------------------|-----|-----|-----|-----|---------------|---------|--------------------------------|-----|-----|-----|-----------|---------------|--|
| 53                             | Cu1 | N1  | C11 | C12 | -173.3(4)     | -172.03 | C18                            | C19 | C14 | C13 | 179.6(6)  | -179.96       |  |
| 54                             | C19 | N1  | C11 | C12 | -0.3(7)       | 2.22    | N1                             | C19 | C18 | O1  | 0.6(8)    | 0.2           |  |
| 5                              | O2  | C2  | C3  | C4  | -1.5(8)       | 1.15    | N1                             | C19 | C18 | C17 | -178.7(5) | -179.8        |  |
| 56                             | C1  | C2  | C3  | C4  | 178.5(4)      | -178.45 | C14                            | C19 | C18 | O1  | -179.9(5) | 179.99        |  |
| 57                             | O2  | C2  | C1  | F1  | 57.8(5)       | 57.5    | C14                            | C19 | C18 | C17 | 0.7(9)    | -0.01         |  |
| 58                             | O2  | C2  | C1  | F2  | -57.9(5)      | -60.88  | C19                            | C14 | C15 | C16 | -0.9(9)   | -0.13         |  |
| 59                             | O2  | C2  | C1  | F3  | -179.7(4)     | 178.5   | C13                            | C14 | C15 | C16 | -179.9(7) | 179.95        |  |
| 60                             | C3  | C2  | C1  | F1  | -122.2(5)     | -122.83 | C19                            | C14 | C13 | C12 | 2(1)      | 0.17          |  |
| 61                             | C3  | C2  | C1  | F2  | 122.1(5)      | 118.8   | C15                            | C14 | C13 | C12 | -178.8(7) | -179.91       |  |
| 62                             | C3  | C2  | C1  | F3  | 0.3(6)        | -1.82   | C14                            | C15 | C16 | C17 | -0(1)     | 0.05          |  |
| 63                             | O1  | C18 | C19 | N1  | -0.5(6)       | -8.26   | C4                             | C5  | C10 | C9  | 179.7(6)  | 179.79        |  |
| 64                             | O1  | C18 | C19 | C14 | 179.2(4)      | 173.46  | C6                             | C5  | C10 | C9  | -1(1)     | -0.81         |  |
| 65                             | C17 | C18 | C19 | N1  | -179.4(4)     | 173.78  | C4                             | C5  | C6  | C7  | 178.7(7)  | 179.58        |  |
| 66                             | C17 | C18 | C19 | C14 | 0.2(7)        | -4.5    | C10                            | C5  | C6  | C7  | -1(1)     | 0.2           |  |
| 67                             | O1  | C18 | C17 | C16 | -179.6(4)     | -173.77 | C15                            | C16 | C17 | C18 | 1(1)      | 0.06          |  |
| 68                             | C19 | C18 | C17 | C16 | -0.8(7)       | 4.06    | C16                            | C17 | C18 | O1  | 179.0(6)  | 179.93        |  |
| 69                             | N1  | C19 | C14 | C15 | 179.7(4)      | -175.75 | C16                            | C17 | C18 | C19 | -1.7(9)   | -0.07         |  |
| 70                             | N1  | C19 | C14 | C13 | 0.2(7)        | 1.81    | O3                             | C2  | C1  | F1  | 161.9(7)  | -178.88       |  |
| 71                             | C18 | C19 | C14 | C15 | 0.1(7)        | 2.43    | O3                             | C2  | C1  | F3  | 35.5(9)   | 60.68         |  |
| 72                             | C18 | C19 | C14 | C13 | -179.4(5)     | 179.99  | O3                             | C2  | C1  | F2  | -78.2(8)  | -58.2         |  |
| 73                             | O3  | C4  | C5  | C6  | -161.8(5)     | -155.46 | C3                             | C2  | C1  | F1  | -20(1)    | 0.92          |  |
| 74                             | O3  | C4  | C5  | C10 | 15.3(6)       | 23.43   | C3                             | C2  | C1  | F3  | -146.0(7) | -119.53       |  |
| 75                             | C3  | C4  | C5  | C6  | 18.8(7)       | 25.69   | C3                             | C2  | C1  | F2  | 100.4(8)  | 121.6         |  |
| 76                             | C3  | C4  | C5  | C10 | -164.1(5)     | -155.42 | C5                             | C10 | C9  | C8  | -0(1)     | 0.77          |  |
| 77                             | O3  | C4  | C3  | C2  | 4.6(7)        | 2.82    | C5                             | C6  | C7  | C8  | 3(1)      | 0.45          |  |
| 78                             | C5  | C4  | C3  | C2  | -176.1(4)     | -178.41 | C14                            | C13 | C12 | C11 | -2(1)     | 0             |  |
| 79                             | C4  | C5  | C6  | C7  | 178.4(5)      | 178.89  | <b>Correlation coefficient</b> |     |     |     |           | <b>0.9795</b> |  |
| 80                             | C10 | C5  | C6  | C7  | 1.2(8)        | 0       |                                |     |     |     |           |               |  |
| 81                             | C4  | C5  | C10 | C9  | -179.0(5)     | -179.74 |                                |     |     |     |           |               |  |
| 82                             | C6  | C5  | C10 | C9  | -1.8(8)       | -0.81   |                                |     |     |     |           |               |  |
| 83                             | N1  | C11 | C12 | C13 | 0.3(8)        | -0.74   |                                |     |     |     |           |               |  |
| 84                             | C19 | C14 | C15 | C16 | 0.2(8)        | 0.15    |                                |     |     |     |           |               |  |
| 85                             | C13 | C14 | C15 | C16 | 179.6(6)      | -177.22 |                                |     |     |     |           |               |  |
| 86                             | C19 | C14 | C13 | C12 | -0.2(8)       | -0.3    |                                |     |     |     |           |               |  |
| 87                             | C15 | C14 | C13 | C12 | -179.6(6)     | 177.11  |                                |     |     |     |           |               |  |
| 88                             | C5  | C6  | C7  | C8  | 0.2(9)        | 0.68    |                                |     |     |     |           |               |  |
| 89                             | C7  | C8  | C9  | C10 | 0.5(9)        | -0.26   |                                |     |     |     |           |               |  |
| 90                             | C9  | C8  | C7  | C6  | -1.1(9)       | -0.55   |                                |     |     |     |           |               |  |
| 91                             | C18 | C17 | C16 | C15 | 1.1(8)        | -1.65   |                                |     |     |     |           |               |  |
| 92                             | C5  | C10 | C9  | C8  | 1.0(9)        | 0.95    |                                |     |     |     |           |               |  |
| 93                             | C14 | C15 | C16 | C17 | -0.8(8)       | -0.57   |                                |     |     |     |           |               |  |
| 94                             | C11 | C12 | C13 | C14 | -0.0(9)       | -0.22   |                                |     |     |     |           |               |  |
| <b>Correlation coefficient</b> |     |     |     |     | <b>0.9912</b> |         |                                |     |     |     |           |               |  |



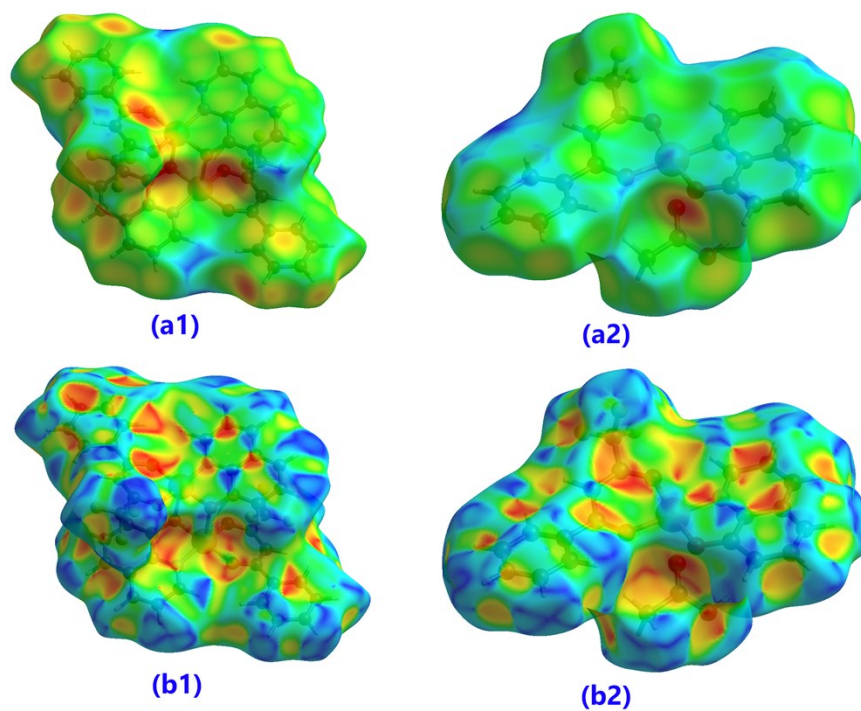

Figure S7 :  $d_c$  surface and shape index surface of polymorph 1 (a) and 2 (b).

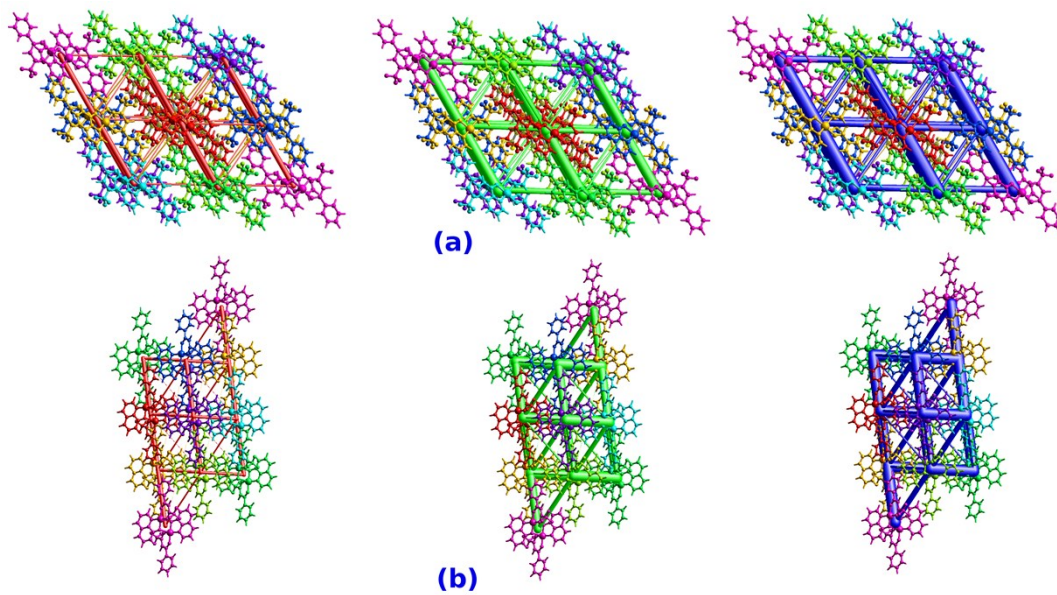

Figure S8: Energy frameworks of polymorph 1 corresponding to the different energy components viewed along  $a$  and  $c$ -axis.

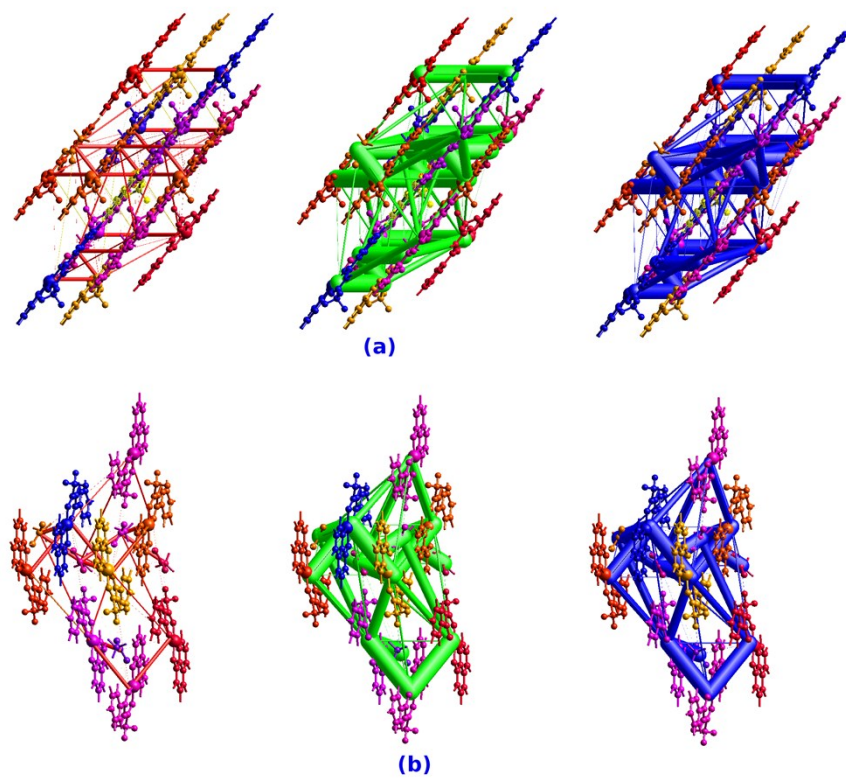

Figure S9: Packing of molecules and energy frameworks corresponding to the different energy components viewed along  $a$  and  $c$ -axis for polymorph 2.

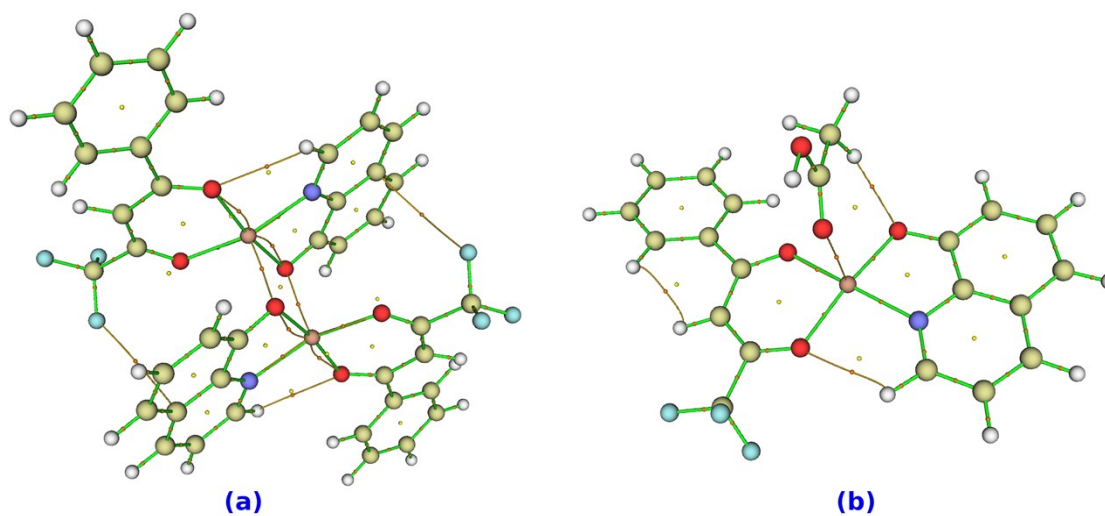

Figure S10: 3D plot of the interactions in the polymorph 1 and 2 showing the connecting bond critical points as orange points.

Table S4: Mulliken and natural charges of the polymorphs **1** and **2**.

| Polymorph 1 |        |          | Polymorph 2 |        |          |
|-------------|--------|----------|-------------|--------|----------|
| Atom        | NBO    | Mulliken | Atom        | NBO    | Mulliken |
| Cu1         | 0.914  | -2.230   | Cu1         | 1.067  | -0.420   |
| O1          | -0.682 | 0.222    | O1          | -0.73  | -0.026   |
| O2          | -0.641 | 0.103    | O2          | -0.652 | 0.055    |
| O3          | -0.651 | 0.035    | O3          | -0.668 | -0.068   |
| N1          | -0.489 | 0.322    | N1          | -0.508 | 0.517    |
| C1          | 1.031  | 0.764    | O4          | -0.616 | -0.115   |
| C2          | 0.402  | 0.206    | O5          | -0.679 | -0.161   |
| C3          | -0.458 | -0.981   | C1          | 1.020  | 0.722    |
| C4          | 0.511  | 0.286    | C2          | 0.406  | -0.300   |
| C5          | -0.110 | 1.206    | C3          | -0.451 | -0.700   |
| C6          | -0.175 | -0.910   | C4          | 0.516  | -0.093   |
| C7          | -0.203 | -0.443   | C5          | -0.119 | 1.229    |
| C8          | -0.186 | -0.169   | C6          | -0.169 | -1.137   |
| C9          | -0.203 | 0.291    | C7          | -0.205 | -0.419   |
| C10         | -0.163 | 0.367    | C8          | -0.18  | -0.145   |
| C11         | 0.103  | 0.067    | C9          | -0.203 | -0.24    |
| C12         | -0.241 | -0.452   | C10         | -0.157 | 0.608    |
| C13         | -0.106 | 0.222    | C11         | 0.09   | -0.125   |
| C14         | -0.086 | 0.540    | C12         | -0.249 | -0.467   |
| C15         | -0.194 | -0.350   | C13         | -0.116 | -0.123   |
| C16         | -0.181 | -0.229   | C14         | -0.079 | 0.517    |
| C17         | -0.232 | 0.059    | C15         | -0.25  | -0.302   |
| C18         | 0.362  | 0.535    | C16         | -0.166 | -0.31    |
| C19         | 0.162  | 0.158    | C17         | -0.276 | -0.353   |
| F1          | -0.353 | -0.041   | C18         | 0.350  | -0.028   |
| F2          | -0.360 | -0.049   | C19         | 0.137  | -0.048   |
| F3          | -0.348 | -0.134   | C20         | 0.692  | -0.504   |
|             |        |          | C21         | 0.829  | 0.212    |
|             |        |          | F1          | -0.357 | -0.145   |
|             |        |          | F2          | -0.350 | -0.068   |
|             |        |          | F3          | -0.350 | -0.068   |
